# Supplementary material for: A one-dimensional cobalt-based coordination polymer as a cathode material of lithium-ion batteries
Source: Royal Society of Chemistry journal article supplement (doi:10.1039/d3dt00398a), 2023-01-01
Supplement: d3dt00398a1.pdf [file d3dt00398a1.pdf]

---

## Supporting Information

### A one-dimensional cobalt-based coordination polymer as a cathode material of lithium-ion batteries

Daozhen Shen<sup>1</sup>, Yanyong Sha<sup>1</sup>, Chen Chen<sup>2</sup>, Xiaojuan Chen<sup>1</sup>, Qingyan Jiang<sup>1</sup>,

Hongjiang Liu<sup>2\*</sup>, Wenlong Liu<sup>3\*</sup>, and Qi Liu<sup>1\*</sup>

<sup>1</sup>Jiangsu Key Laboratory of Advanced Catalytic Materials and Technology,  
Advanced Catalysis Green Manufacturing Collaborative Innovation Center and  
School of Petrochemical Engineering, Changzhou University, 1 Gehu Road,  
Changzhou, Jiangsu 213164, China.

<sup>2</sup>Department of Chemistry, College of Science, Shanghai University, No. 99  
Shangda Road, Shanghai, 200444, P. R. China

<sup>3</sup>School of Chemistry and Chemical Engineering, Yangzhou University, Yangzhou  
Jiangsu 225009, P. R. China

Corresponding Authors: Prof. Qi Liu, E-mail: liuqi62@163.com; Prof. Hong-Jiang  
Liu, E-mail: liuhj@shu.edu.cn; Prof. Wen-Long Liu, E-mail: liuwl@yzu.edu.cn

#### 1. Figures and Tables

**Table S1** Crystallographic data of Co-DTBPT

| Compound          | Co-DTBPT                                                          |
|-------------------|-------------------------------------------------------------------|
| Empirical formula | C <sub>52</sub> H <sub>38</sub> CoN <sub>18</sub> O <sub>20</sub> |
| Formula weight    | 1293.93                                                           |
| T(K)              | 296(2)                                                            |
| Crystal system    | triclinic                                                         |
| space group       | <i>P</i> -1                                                       |
| a (Å)             | 9.1717(13)                                                        |
| b (Å)             | 10.5650(13)                                                       |

|                                                  |                                |
|--------------------------------------------------|--------------------------------|
| c(Å)                                             | 18.044(2)                      |
| a (°)                                            | 74.318(4)                      |
| β (°)                                            | 86.913(4)                      |
| γ (°)                                            | 73.682(4)                      |
| V(Å <sup>3</sup> )                               | 1615.1(4)                      |
| Z, D <sub>calculated</sub> (g·cm <sup>-3</sup> ) | 1, 1.330                       |
| Mu (Mo K <sub>α</sub> ) (mm <sup>-1</sup> )      | 0.349                          |
| F (000)                                          | 663                            |
| Crystal size(mm)                                 | 0.05×0.04×0.02                 |
| θ range for data collection (°)                  | 2.31 to 23.99                  |
| Index ranges                                     | -11/11, -13/13,-23/23          |
| no. of total reflns                              | 25601                          |
| Unique reflns                                    | 7474(R <sub>int</sub> =0.0690) |
| Data / restraints / parameters                   | 7474/409/0                     |
| Goodness- of-fit on F <sup>2</sup>               | 1.004                          |
| R <sub>1</sub> , wR <sub>2</sub> [I>2σ(I)]       | 0.0627,0.1509                  |
| R <sub>1</sub> , wR <sub>2</sub> (all data)      | 0.1295,0.1509                  |
| Largest diff. peak and hole/e·Å <sup>-3</sup>    | 0.433and-0.369                 |

**Table S2** Main bond length (Å) and bond angle (°) in Co-DTBPT

| <b>Co-DTBPT</b>                      |             |                                      |           |
|--------------------------------------|-------------|--------------------------------------|-----------|
| Co1-O6                               | 2.024 (2)   | Co1-O5 <sup>i</sup>                  | 2.126 (2) |
| Co1-O6 <sup>i</sup>                  | 2.024 (2)   | Co1-N1                               | 2.165 (2) |
| Co1-O5                               | 2.126 (2)   | Co1-N1 <sup>i</sup>                  | 2.165 (2) |
| O6 <sup>i</sup> -Co1-O6              | 180.00 (11) | O6-Co1-O5 <sup>i</sup>               | 88.87(9)  |
| O6-Co1-O5                            | 91.13(9)    | O6 <sup>i</sup> -Co1-O5 <sup>i</sup> | 91.13(9)  |
| O6 <sup>i</sup> -Co1-O5              | 88.87(9)    | O5 <sup>i</sup> -Co1-O5              | 180.0     |
| O6 <sup>i</sup> -Co1-N1              | 90.98(9)    | O6-Co1-N1                            | 89.02(9)  |
| O5 <sup>i</sup> -Co1-N1 <sup>i</sup> | 97.40(9)    | O5 <sup>i</sup> -Co1-N1              | 82.60(9)  |
| O6 <sup>i</sup> -Co1-N1 <sup>i</sup> | 89.02(9)    | O6-Co1-N1                            | 90.98(9)  |
| O5 <sup>i</sup> -Co1-N1 <sup>i</sup> | 82.60(9)    | O5-Co1-N1                            | 97.40(9)  |
| N1 <sup>i</sup> -Co1-N1              | 180.00(13)  |                                      |           |

Symmetry codes:(i) 1 - x, 1 - y, 1 - z.

**Table S3** Bond length (Å) and bond angle (°) of hydrogen bond in Co-DTBPT

| D–H···A                           | D–H  | H···A | D···A     | ∠D–H···A |
|-----------------------------------|------|-------|-----------|----------|
| O(6)–H(6A)···N(6)                 | 0.99 | 1.88  | 2.813 (4) | 155      |
| O(6)–H(6B)···N(6)                 | 0.85 | 2.2   | 2.813 (4) | 129      |
| C(2)–H(2)···O(9) <sup>iii</sup>   | 0.93 | 2.35  | 3.117 (5) | 140      |
| C(10)–H(10)···O(10) <sup>iv</sup> | 0.93 | 2.58  | 3.407 (5) | 149      |
| C(18)–H(18)···O(3) <sup>v</sup>   | 0.93 | 2.39  | 2.223 (4) | 149      |
| C(20)–H(20C)···O(5)               | 0.96 | 2.39  | 2.767 (6) | 103      |
| C(23)–H(23)···O(7)                | 0.93 | 2.36  | 2.732 (5) | 103      |
| C(23)–H(23)···O(9)                | 0.93 | 2.32  | 2.690 (5) | 103      |

Symmetry codes: (iii)  $x, y, -1 + z$ ; (iv)  $1 + x, y, -1 + z$ ; (v)  $1 + x, y, z$ .

**Table S4** The capacity comparison of some CP/MOF based cathode materials for

LIBs.

| Cathode materials                                                                                   | Content of active materials | Specific Capacity (mAh g <sup>-1</sup> ) | Current Density (mA g <sup>-1</sup> )/C rate | Cycle numbers | Voltage (V vs. Li/Li <sup>+</sup> ) | Ref. |
|-----------------------------------------------------------------------------------------------------|-----------------------------|------------------------------------------|----------------------------------------------|---------------|-------------------------------------|------|
| Co (HAT-CN)                                                                                         | 60%                         | 136                                      | 40                                           | 200           | 1.2-3.9                             | S1   |
| CuFe-PBA                                                                                            | 70%                         | 25                                       | 10                                           | 50            | 2.5-4.3                             | S2   |
| MIL-53(Fe)                                                                                          | 85%                         | 70                                       | 50                                           | 50            | 1.5-3.5                             | S3   |
| MIL-68                                                                                              | 70%                         | 32                                       | C/10                                         | 12            | 1.5-3.5                             | S4   |
| MIL-136(Co)                                                                                         | 70%                         | 20                                       | 10 C                                         | 50            | 2.0-4.0                             | S5   |
| SNNU-73                                                                                             | 60%                         | 67.5                                     | 50                                           | 50            | 0.3-3.0                             | S6   |
| SNNU-74                                                                                             | 60%                         | 41.5                                     | 50                                           | 50            | 0.3-3.0                             | S6   |
| Cu <sub>3</sub> (HHTP) <sub>2</sub>                                                                 | 80%                         | 95                                       | 1 C                                          | 100           | 1.7-3.5                             | S7   |
| Cu-THQ                                                                                              | 70%                         | 340                                      | 50                                           | 100           | 1.2-4.0                             | S8   |
| Zinc(II) Complex 5                                                                                  | 10%                         | 57                                       | 1 C                                          | 1000          | 1.4-4.0                             | S9   |
| (H <sub>2</sub> NMe <sub>2</sub> ) <sub>2</sub> Fe <sub>2</sub> (Cl <sub>2</sub> dhbq) <sub>3</sub> | 80%                         | 150                                      | 40                                           | 50            | 1.8-4.2                             | S10  |

|                                    |     |      |       |       |         |           |
|------------------------------------|-----|------|-------|-------|---------|-----------|
| 1D-DS-Co-MOF                       | 30% | 72   | 200   | 100   | 2.5-3.2 | S11       |
| 2D-DS-Cu-MOF                       | 30% | 84   | 50    | 100   | 2.4-4.1 | S11       |
| 3D-DS-Mn-MOF                       | 30% | 109  | 200   | 100   | 1.7-4.2 | S11       |
| Cu-TCA                             | 80% | 39.9 | 0.5 C | 200   | 1.4-4.3 | S12       |
| Cd(II)MOF 1                        | 45% | 32.5 | 100   | 50    | 1.8-3.4 | S13       |
| Cd(II)MOF 2                        | 45% | 36.7 | 100   | 50    | 1.8-3.4 | S13       |
| Co(II)MOF 3                        | 45% | ~3   | 100   | 50    | 1.8-3.4 | S13       |
| Co(II)MOF 4                        | 45% | ~6   | 100   | 50    | 1.8-3.4 | S13       |
| NiDI                               | 70% | ~46  | 250   | 300   | 2.0-4.5 | S14       |
| Fe <sub>2</sub> (DFc) <sub>3</sub> | 60% | 70   | 2000  | 10000 | 2.0-4.2 | S15       |
| Co-DTBPT                           | 30% | 55   | 50    | 100   | 1.5-4.0 | This work |

**Table S5** electrochemical Impedance Spectroscopy fitting values of Co-DTBPT

electrode in different cycle stages

| Sample          | $R_1$ | $R_{ct}$ | $R_s$ | CPE <sub>1</sub> -T   | CPE <sub>1</sub> -P | CPE <sub>2</sub> -T   | CPE <sub>2</sub> -P | W <sub>1</sub> -R | W <sub>1</sub> -T     | W <sub>1</sub> -P |
|-----------------|-------|----------|-------|-----------------------|---------------------|-----------------------|---------------------|-------------------|-----------------------|-------------------|
| After 1 cycle   | 8.14  | 13.55    | 70.6  | $1.80 \times 10^{-5}$ | 0.833               | $2.92 \times 10^{-6}$ | 1.00                | 33.29             | 5.09                  | 0.435             |
| After 50 cycles | 12.69 | 96.68    | 67.8  | $5.42 \times 10^{-3}$ | 0.474               | $3.03 \times 10^{-5}$ | 0.73                | 0.010             | $1.33 \times 10^{-4}$ | 0.428             |

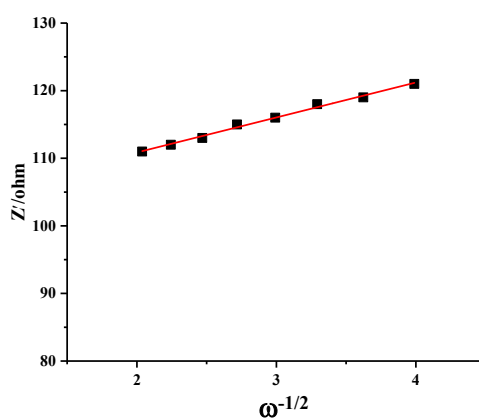

**Figure S1.** The linear fitting of the  $Z'$  vs square root of frequency ( $\omega^{-1/2}$ ) relationship, where  $\omega$  is the angle frequency and  $Z'$  is the real part of Nyquist impedance of the Co-DTBPT electrode after 1 cycle.

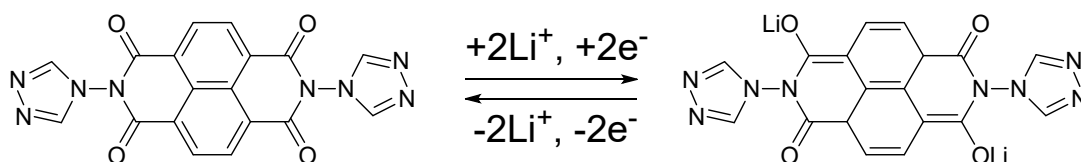

**Figure S2.** The possible mechanism of lithium ions intercalation/deintercalation for 4-DTBPT

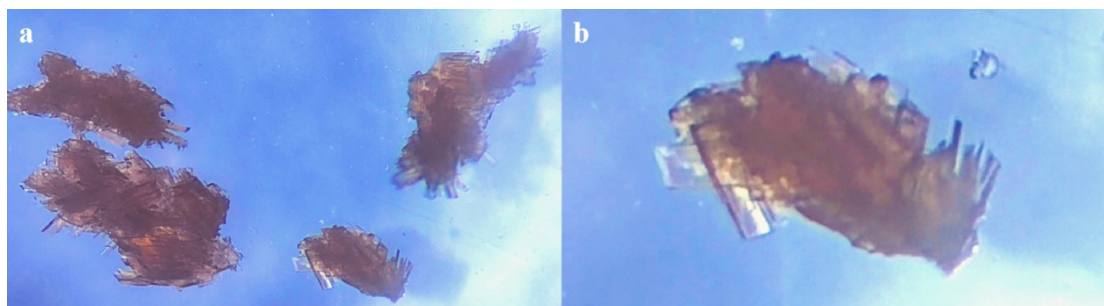

**Figure S3.** The crystal optical photos of Co-DTBPT (a) Low and (b) high magnification.

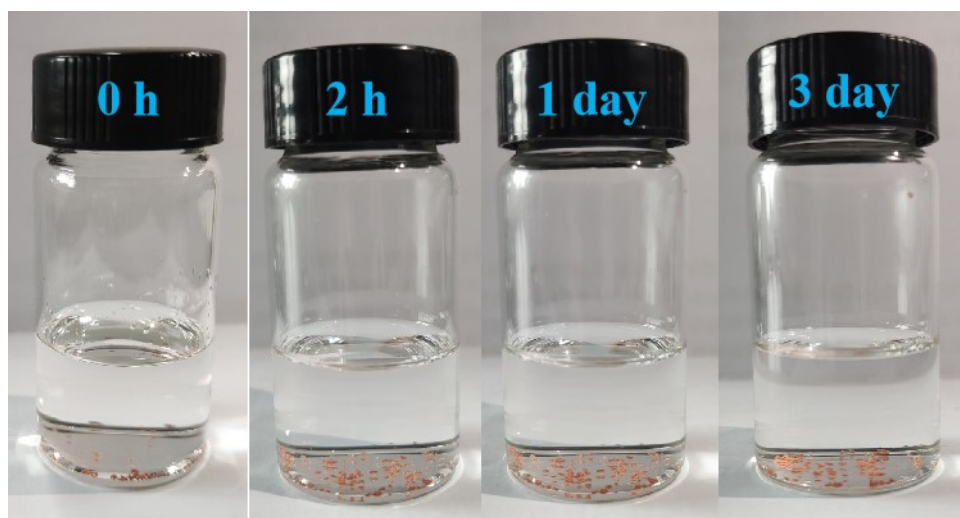

**Figure S4.** Photographs of Co-DTBPT soaked in the electrolyte for different time durations.

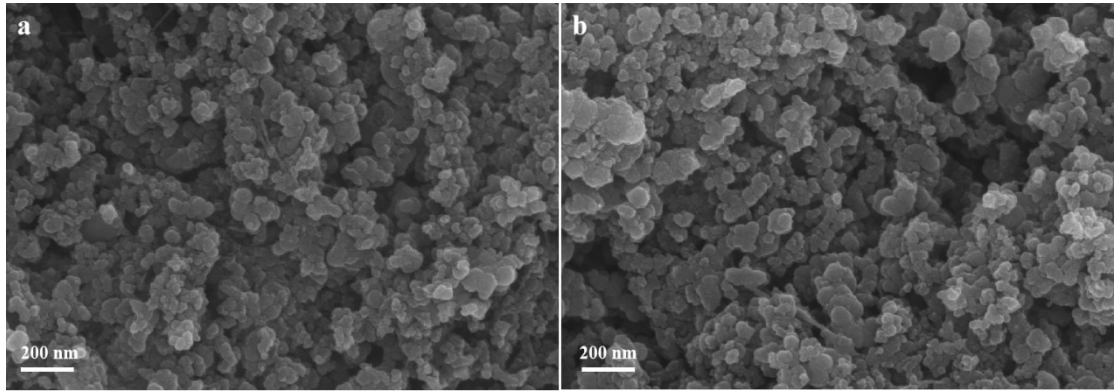

**Figure S5.** The SEM images of the Co-DTBPT electrode: (a) pristine; (b) after 20 cycles

The theoretical capacity of Co-DTBPT and 4-DTBPT can be calculated based on following formula:

$$C = 26.8 \frac{n}{M}$$

$$\text{Co-DTBPT: } C = 26.8 \frac{n}{M} = 26.8 \times \frac{5}{1293.93} = 0.1036 \text{ Ah g}^{-1} = 103.6 \text{ mAh g}^{-1}$$

$$\text{4-DTBPT: } C = 26.8 \frac{n}{M} = 26.8 \times \frac{2}{400} = 0.1340 \text{ Ah g}^{-1} = 134.0 \text{ mAh g}^{-1}$$

---

## 2. References

[S1] Wang, Y.; Poldorn, P.; Wongnongwa, Y.; Jungsuttiwong, S.; Chen, C.; Yu, L.; Wang, Z.; Shi, L.; Zhao, Y.; Yuan, S. Cobalt (II)-hexaazatriphenylene hexacarbonitrile coordination compounds based cathode materials with high capacity and long cycle stability. *Adv. Funct. Mater.* **2022**, *32*, 2111043.

[S2] Asakura, D.; Li, C. H.; Mizuno, Y.; Okubo, M.; Zhou, H.; Talham D. R. Bimetallic cyanide-bridged coordination polymers as lithium ion cathode materials: core@ shell nanoparticles with enhanced cyclability. *J. Am. Chem. Soc.* **2013**, *135*, 2793-2799.

[S3] Férey, G.; Millange, F.; Morcrette, M.; Serre, C.; Doublet, M. L.; Grenèche, J. M.; Tarascon, J. M. Mixed-valence Li/Fe-based metal-organic frameworks with both reversible redox and sorption properties. *Angew. Chem. Int. Edit.* **2007**, *46*, 3259-3263.

[S4] Fateeva, A.; Horcajada, P.; Devic, T.; Serre, C.; Marrot, J.; Grenèche, J. M.; Morcrette, M.; Tarascon, J. M.; Maurin, G.; Férey, G. Synthesis, structure, characterization, and redox properties of the porous MIL-68 (Fe) solid. *Eur. J. Inorg. Chem.* **2010**, *24*, 3789-3794.

[S5] Nguyen, T. L. A.; Devic, T.; Mialane, P.; Rivière, E.; Sonnauer, A.; Stock, N.; Demir-Cakan, R.; Morcrette, M.; Livage, C.; Marrot, J.; Tarascon, J. M.; Férey, G. Reinvestigation of the MII (M= Ni, Co)/tetrathiafulvalenetetracarboxylate system using high-throughput methods: isolation of a molecular complex and its single-crystal-to-single-crystal transformation to a two-dimensional coordination polymer. *Inorg. Chem.* **2010**, *49*, 10710-10717.

---

[S6] Du, Z. Q.; Li, Y. P.; Wang, X. X.; Wang, J.; Zhai, Q. G. Enhanced electrochemical performance of Li-Co-BTC ternary metal-organic frameworks as cathode materials for lithium-ion batteries. *Dalton Tran.* **2019**, *48*, 2013-2018.

[S7] Gu, S.; Bai, Z.; Majumder, S.; Huang, B.; Chen, G. Conductive metal-organic framework with redox metal center as cathode for high rate performance lithium ion battery. *J. Power Sources* **2019**, *429*, 22-29.

[S8] Jiang, Q.; Xiong, P. X.; Liu, J. J.; Xie, Z.; Wang, Q. C.; Yang, X. Q. Hu, E. Y.; Cao, Y.; Sun, J.; Xu, Y. H.; Chen, L. A redox-active 2D metal-organic framework for efficient lithium storage with extraordinary high capacity. *Angew. Chem. Int. Ed.* **2020**, *59*, 5273-5277.

[S9] Murata, T.; Koide, T.; Nobukuni, H.; Tsuji, R.; Morita, Y. 2D coordination network of trioxotriangulene with multiple redox abilities and its rechargeable battery performance. *Int. J. Mol. Sci.* **2020**, *21*, 4723.

[S10] Ziebel, M. E.; Gaggioli, C. A. Turkiewicz, A. B.; Ryu, W.; Gagliardi, L.; Long, J. R. Effects of covalency on anionic redox chemistry in semiquinoid-based metal-organic frameworks. *J. Am. Chem. Soc.* **2020**, *142*, 2653-2664.

[S11] Shimizu, T.; Wang, H.; Matsumura, D.; Mitsuhashi, K.; Ohta, T.; Yoshikawa, H. Porous metal-organic frameworks containing reversible disulfide linkages as cathode materials for lithium-ion batteries. **2020**, *13*, 2256-2263.

[S12] Peng, Z.; Yi, X.; Liu, Z.; Shang, J.; Wang, D. Triphenylamine-based metal-organic frameworks as cathode materials in lithium-ion batteries with coexistence of redox active sites, high working voltage, and high rate stability. *ACS Appl. Mater.*



---

*Interfaces* **2016**, *8*, 14578-14585.

[S13] Tian, B.; Ning, G. H.; Gao, Q.; Tan, L. M.; Tang, W.; Chen, Z.; Su, C.; Loh, K. P. Crystal engineering of naphthalenediimide-based metal-organic frameworks: structure-dependent lithium storage. *ACS Appl. Mater. Interfaces* **2016**, *8*, 31067-31075.

[S14] Wada, K.; Sakaushi, K.; Sasaki, S.; Nishihara, H. Multielectron-transfer-based rechargeable energy storage of two-dimensional coordination frameworks with non-innocent ligands. *Angew. Chem. Int. Ed.* **2018**, *57*, 8886-8890.

[S15] Li, C.; Zhang, C.; Xie, J.; Wang, K. B.; Li, J. Z.; Zhang, Q. C. Ferrocene-based metal-organic framework as a promising cathode in lithium-ion battery. *Chem. Eng. J.* **2021**, *404*, 126463.
